# Supplementary material
Source: Springer Nature journal article supplement (https://www.springermedizin.de/resource/supplementary/13722_2012_124_MOESM1_ESM.pdf/9674852)

# Prior and More Recent Emergency Department SBIRT Designs

## Prior Designs in ED SBIRT Studies

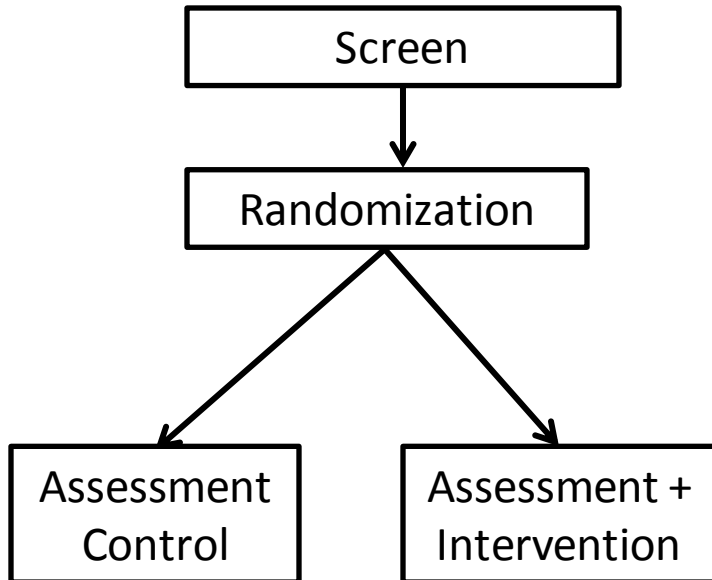

## Recent Designs in ED SBIRT Studies

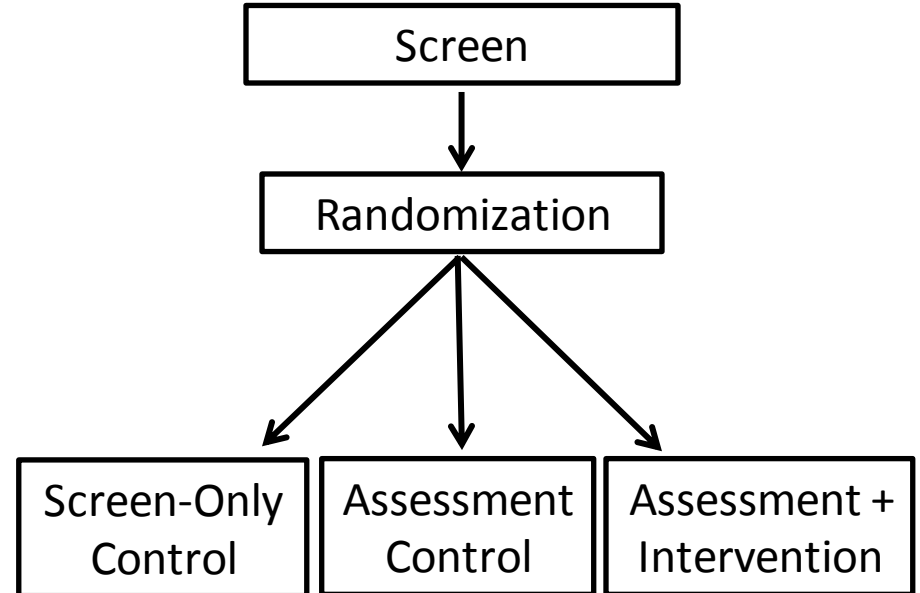

Supplement: MOESM1 [file 9674852]
